# Supplementary material for: Adenoidectomy for middle ear disease in cleft palate children: a systematic review
Source: Springer Nature journal article supplement (doi:10.1007/s00405-021-07035-6), 2021-08-28
Supplement: MOESM1 [file 19607856]

# ADENOIDECTOMY FOR MIDDLE EAR DISEASE IN CLEFT PALATE CHILDREN: A SYSTEMATIC REVIEW

Journal: European Archives of Oto-Rhino-Laryngology

Authors: Cecilia Rosso, Antonio Bulfamante, Pipolo Carlotta, Fuccillo Emanuela, Maccari Alberto, Lozza Paolo, Scotti Alberto, Pisani Antonia, Castellani Luca, De Donato Giuseppe, Tavilla Maria Chiara, Portaleone Sara, Felisati Giovanni, Saibene Alberto Maria

Correspondence to: Alberto Maria Saibene, Otolaryngology Unit - ASST Santi Paolo e Carlo. Via Antonio di Rudinì, 8 - 20142 - Milan, Italy. Phone: +39 02 8184 4249. Fax: +39 02 5032 3166. Mail: [alberto.saibene@gmail.com](mailto:alberto.saibene@gmail.com)

## Online resource 1: Search strategy ad results for all consulted databases

| Database                                                   | Search strategy                                             | Date of search         | Unique items found |
|------------------------------------------------------------|-------------------------------------------------------------|------------------------|--------------------|
| MEDLINE                                                    | ("adenoidectomy" OR "adenotonsillectomy")<br>AND<br>"cleft" | November<br>18th, 2020 | 161                |
| Embase                                                     |                                                             |                        | 259                |
| Web of Science                                             |                                                             |                        | 120                |
| Cochrane library                                           |                                                             |                        | 6                  |
| <a href="http://Clinicaltrials.gov">Clinicaltrials.gov</a> |                                                             |                        | 11                 |
