# Supplementary material for: Adenoidectomy for middle ear disease in cleft palate children: a systematic review
Source: Springer Nature journal article supplement (doi:10.1007/s00405-021-07035-6), 2021-08-28
Supplement: MOESM2 [file 19607856]

## **ADENOIDECTOMY FOR MIDDLE EAR DISEASE IN CLEFT PALATE CHILDREN: A SYSTEMATIC REVIEW**

**Journal: European Archives of Oto-Rhino-Laryngology**

**Authors: Cecilia Rosso, Antonio Bulfamante, Pipolo Carlotta, Fuccillo Emanuela, Maccari Alberto, Lozza Paolo, Scotti Alberto, Pisani Antonia, Castellani Luca, De Donato Giuseppe, Tavilla Maria Chiara, Portaleone Sara, Felisati Giovanni, Saibene Alberto Maria**

**Online resource 2: PRISMA style flow diagram of studies selection through the review**
